# Supplementary material for: Risk Factors Associated With COVID-19 Transmission Among US Air Force Trainees in a Congregant Setting
Source: PubMed Central journal article supplement (PMC7907953; doi:10.1001/jamanetworkopen.2021.0202), 2021-02-25
Supplement: jamanetwopen-e210202-s001.pdf [file jamanetwopen-e210202-s001.pdf]

## Supplemental Online Content

Marcus JE, Frankel DN, Pawlak MT, et al. Risk factors associated with COVID-19 transmission among US Air Force trainees in a congregant setting. *JAMA Netw Open*. 2021;4(2):e210202. doi:10.1001/jamanetworkopen.2021.0202

**eTable 1.** Summary of Demographic Characteristics and COVID-19 Cases in Cohorts With Case Clusters

**eTable 2.** Number of Cases per Day for Each Flight That Met the Definition of a Cluster

**eTable 3.** Univariate and Binomial Logistic Regression of Symptoms Present on Day 1 of Cases for Index Case in a Cohort and Subsequent Risk of Outbreak

This supplemental material has been provided by the authors to give readers additional information about their work.

eTable 1. Summary of Demographic Characteristics and COVID-19 Cases in Cohorts With Case Clusters

| Cohort | Gender | Week of Training of first case in cluster | Clustered cases in arrival quarantine | Number of Positive COVID-19 cases | Median cycle threshold on day 1 (95% CI) <sup>a</sup> | Median number of symptoms on day 1(95% CI) | Median cycle threshold for all cases in cluster (95% CI) <sup>a</sup> |
|--------|--------|-------------------------------------------|---------------------------------------|-----------------------------------|-------------------------------------------------------|--------------------------------------------|-----------------------------------------------------------------------|
| 1      | Female | 7                                         | No                                    | 6                                 | 23.7 (21.6-26.0)                                      | 5 (4-5)                                    | 25.3 (22.1-28.2)                                                      |
| 2      | Male   | 5                                         | No                                    | 8                                 | 17.7 (16.9-20.0)                                      | 1 (1-2)                                    | 19.3 (18.3-20.8)                                                      |
| 3      | Female | 6                                         | No                                    | 8                                 | 18.4 (14.2-27.1)                                      | 5 (2-7)                                    | 22.4 (15.3-27.0)                                                      |
| 4      | Male   | 0                                         | Yes                                   | 9                                 | --                                                    | 0                                          | --                                                                    |
| 5      | Male   | 7                                         | No                                    | 10                                | --                                                    | 4 (3-4)                                    | --                                                                    |
| 6      | Female | 2                                         | Yes                                   | 10                                | 18.1                                                  | 1                                          | 23.8 (20.6-32.3)                                                      |
| 7      | Male   | 6                                         | No                                    | 12                                | 22.3                                                  | 6                                          | 19.0 (16.1-22.3)                                                      |
| 8      | Male   | 5                                         | No                                    | 12                                | 13.5                                                  | 6                                          | 17.8 (16.5-18.2)                                                      |
| 9      | Male   | 1                                         | Yes                                   | 13                                | 19.9                                                  | 8                                          | 31.1 (24.0-32.8)                                                      |
| 10     | Male   | 4                                         | No                                    | 17                                | 22.6 (17.8-22.6)                                      | 3 (2-3)                                    | 21.1 (19.9-22.6)                                                      |
| 11     | Male   | 2                                         | Yes                                   | 28                                | 25.5 (20.1-29.7)                                      | 0 (0-3)                                    | 23.9 (18.6-28.5)                                                      |
| 12     | Male   | 5                                         | No                                    | 28                                | --                                                    | 2 (1-3)                                    | 31.1 (21.8-34.0)                                                      |
| 13     | Male   | 4                                         | No                                    | 31                                | 19.5                                                  | 3                                          | 20.6 (18-23.7)                                                        |
| 14     | Male   | 0                                         | Yes                                   | 36                                | 29.2 (27.1-31.4)                                      | 0                                          | 30.1 (27.0-32.1)                                                      |

<sup>a</sup> Of cases with available data. In clusters without known cycle threshold values marked by "--"

eTable 2. Number of Cases per Day for Each Flight That Met the Definition of a Cluster

| Cohort | Pre-Cluster <sup>a</sup> | Day 1 | Day 2 | Day 3 | Day 4 | Day 5 | Day 6 | Day 7 | Day 8 | Day 9 | Day 10 | Day 11 | Day 12 | Day 13 | Day 14 | Day 15 | Day 16 | Day 17 |
|--------|--------------------------|-------|-------|-------|-------|-------|-------|-------|-------|-------|--------|--------|--------|--------|--------|--------|--------|--------|
| 1      |                          | 4     |       | 1     | 1     |       |       |       |       |       |        |        |        |        |        |        |        |        |
| 2      |                          | 3     | 4     | 1     |       |       |       |       |       |       |        |        |        |        |        |        |        |        |
| 3      | 1                        | 6     |       |       |       |       |       |       |       |       |        |        | 1      |        |        |        |        |        |
| 4      |                          | 9     |       |       |       |       |       |       |       |       |        |        |        |        |        |        |        |        |
| 5      | 1                        | 2     | 1     | 2     |       | 1     | 3     |       |       |       |        |        |        |        |        |        |        |        |
| 6      |                          | 1     |       |       |       |       |       | 1     |       |       |        |        | 7      |        |        |        |        | 1      |
| 7      | 1                        | 1     |       |       | 4     | 2     |       | 1     | 1     | 2     |        |        |        |        |        |        |        |        |
| 8      |                          | 1     |       | 2     |       | 1     | 4     | 2     | 2     |       |        |        |        |        |        |        |        |        |
| 9      |                          | 1     | 1     |       |       | 1     |       |       | 10    |       |        |        |        |        |        |        |        |        |
| 10     | 1                        | 3     |       | 1     | 4     | 3     | 3     | 2     |       |       |        |        |        |        |        |        |        |        |
| 11     |                          | 20    | 1     | 5     | 1     |       |       |       |       |       |        |        |        | 1      |        |        |        |        |
| 12     |                          | 2     | 3     | 1     | 1     |       |       |       | 20    |       |        |        | 1      |        |        |        |        |        |
| 13     |                          | 1     | 6     |       | 9     | 4     | 6     | 3     | 2     |       |        |        |        |        |        |        |        |        |
| 14     |                          | 4     |       |       | 1     |       | 1     | 1     |       |       |        |        |        |        |        | 29     |        |        |

<sup>a</sup>Defined as a COVID-19 case occurring more than 21 days before day 1.

eTable 3. Univariate and Binomial Logistic Regression of Symptoms Present on Day 1 of Cases for Index Case in a Cohort and Subsequent Risk of Outbreak

| Symptoms on Day 1 | Cluster (n=58) | No Cluster (n=151) | p-value | Logistic Regression Odds Ratio (95% CI) | p-value |
|-------------------|----------------|--------------------|---------|-----------------------------------------|---------|
| Chest Pain        | 0              | 6 (14%)            | 0.03    | 0                                       | 1       |
| Headache          | 20 (65%)       | 13 (30%)           | 0.003   | 1.4 (0.5-3.7)                           | 0.46    |
| Fever             | 10 (32%)       | 4 (9%)             | 0.01    | 1.67 (0.4-1.7)                          | 0.49    |
| Myalgia           | 11 (35%)       | 4 (9%)             | 0.01    | 2.4 (0.5-11)                            | 0.28    |
| Runny Nose        | 9 (29%)        | 3 (7%)             | 0.01    | 1.7 (0.4-7)                             | 0.47    |
| Congestion        | 3 (10%)        | 13 (30%)           | 0.03    | 0.2 (.06-.6)                            | 0.02    |
